# Supplementary material for: Targeting macrophage Histone deacetylase 3 stabilizes atherosclerotic lesions
Source: PubMed Central journal article supplement (PMC4197860; doi:10.15252/emmm.201404170), 2014-07-09
Supplement: emmm0006-1124-SD1.pdf [file emmm0006-1124-SD1.pdf]

Figure U1

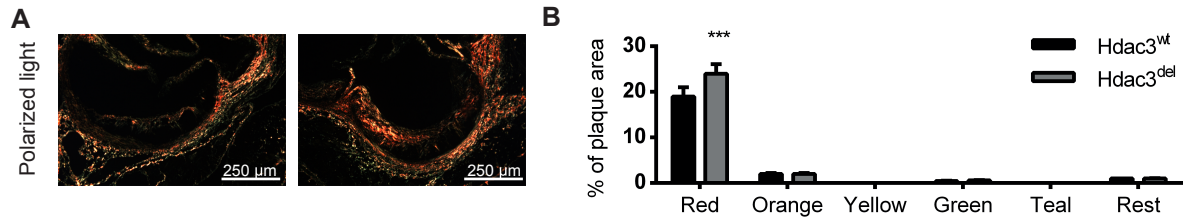

**Figure U1. Myeloid Hdac3 deletion results in more stable collagen in atherosclerotic lesions.**

A and B. Using polarization microscopy on Sirius Red-stained lesions, collagen subtypes were quantified (n=19/18). Statistical analysis was performed using 2-way ANOVA ( $P = 0.0002$ ). Error bars indicate SEM.
