# Supplementary material for: Targeting macrophage Histone deacetylase 3 stabilizes atherosclerotic lesions
Source: PubMed Central journal article supplement (PMC4197860; doi:10.15252/emmm.201404170), 2014-07-09
Supplement: emmm0006-1124-SD3.pdf [file emmm0006-1124-SD3.pdf]

Figure U3

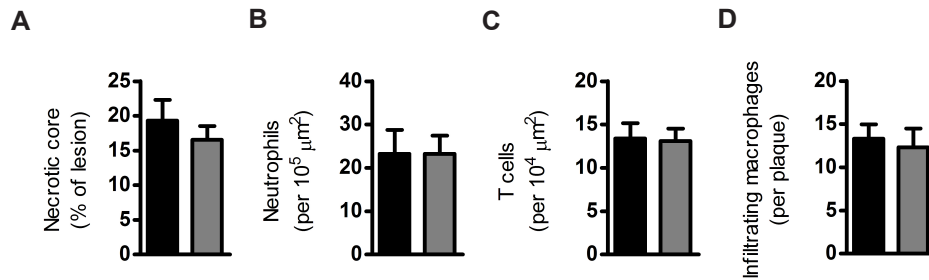

**Figure U3. Myeloid Hdac3 deletion does not affect inflammatory cell infiltration in the atherosclerotic lesions**

A. Necrotic core was calculated as a percentage of lesion area (n=10/10).

B. Neutrophils (NIMP1<sup>+</sup> cells, n=19/18) were counted in the atherosclerotic lesions.

C. T cells (CD3<sup>+</sup> cells, n=19/18) were counted in the atherosclerotic lesions.

D. Infiltrating macrophages (ERMP58<sup>+</sup> cells, n=19/18) were counted in the atherosclerotic lesions. Unpaired t-test was performed for statistical analysis. Error bars indicate SEM.
