# Supplementary material for: Targeting macrophage Histone deacetylase 3 stabilizes atherosclerotic lesions
Source: PubMed Central journal article supplement (PMC4197860; doi:10.15252/emmm.201404170), 2014-07-09
Supplement: emmm0006-1124-SD5.pdf [file emmm0006-1124-SD5.pdf]

Figure U5

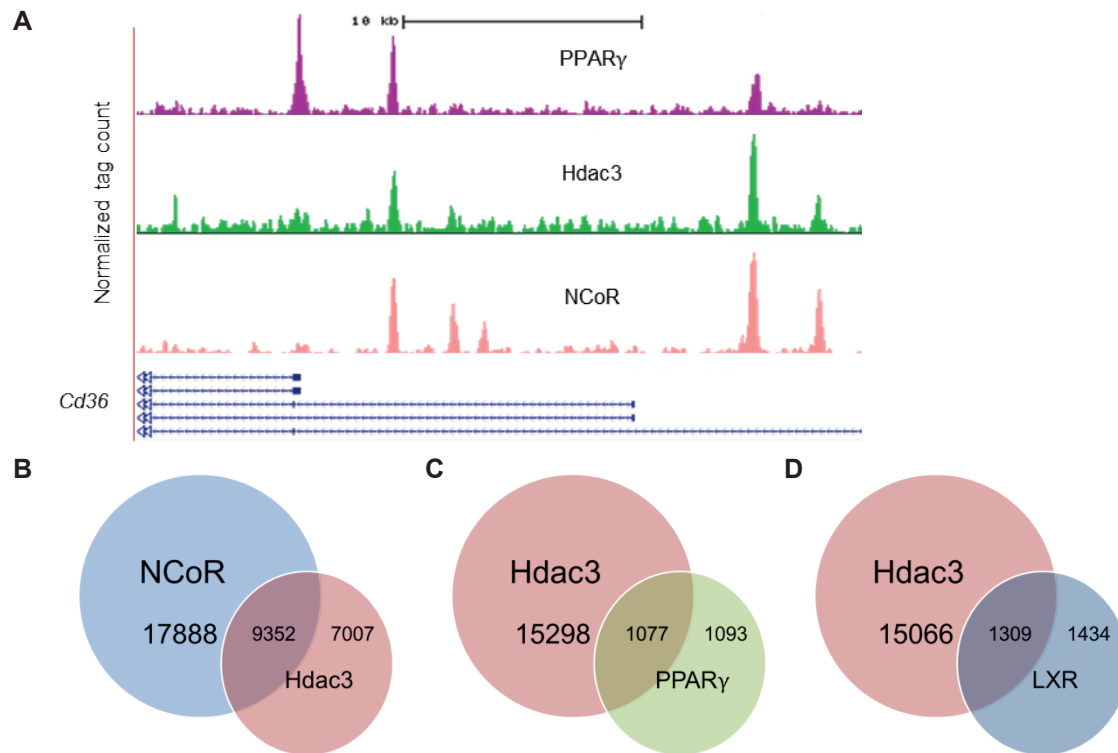

**Figure U5. Hdac3 peaks overlap with PPAR $\gamma$  and LXR peaks**

A. UCSC genome browser image illustrating normalized tag counts for PPAR $\gamma$  (Lefterova et al., 2010), Hdac3 (Mullican et al., 2011) and NCoR (Barish et al., 2012) ChIP-seq at the *Cd36* locus as an example of a PPAR $\gamma$  target gene where PPAR $\gamma$ , Hdac3 and NCoR bind to the same locus.

B-D. Venn diagrams representing the overlap between the NCoR and Hdac3 peaks (B), the Hdac3 and PPAR $\gamma$  peaks (C) and the Hdac3 and LXR (Li et al., 2013) peaks (D).
