# Supplementary material for: Targeting macrophage Histone deacetylase 3 stabilizes atherosclerotic lesions
Source: PubMed Central journal article supplement (PMC4197860; doi:10.15252/emmm.201404170), 2014-07-09
Supplement: emmm0006-1124-SD6.pdf [file emmm0006-1124-SD6.pdf]

Figure Ù6

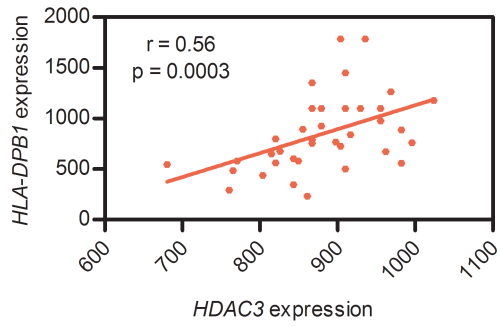

**Figure S6. *HDAC3* correlates with *HLA-DPB1* in human atherosclerotic lesions.** Correlation of *HDAC3* with pro-inflammatory macrophage marker *HLA-DPB1* in gene expression data from human atherosclerotic lesions (n=40). Statistical analysis was performed with Pearson's correlation test.
